# Supplementary material
Source: MDPI journal article supplement (https://www.mdpi.com/2313-0105/9/5/285)
Supplement: s1 [file s1]

# Supplementary materials

## Readily-accessible m-ferrocenyl-phenyl sulfonate as novel cathodic electrolyte for aqueous organic redox flow batteries

Dawei Fang, Junzhi Zheng, Xi Li, Diandian Wang, Yuxuan Yang, Zhuling Liu, Zongren Song and Minghua Jing \*

Institute of Rare and Scattered Elements, College of Chemistry, Liaoning University, Shenyang 110036, China#

\* Correspondence: mhjing@lnu.edu.cn

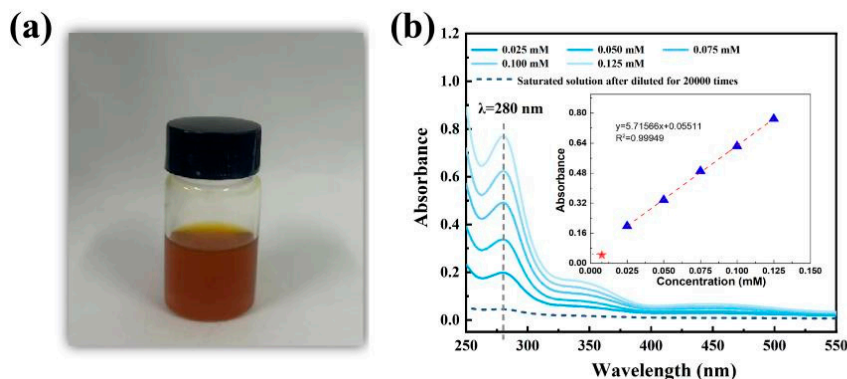

**Figure S1.** Photos of 10 mM BASFc in 0.5M Na<sub>2</sub>SO<sub>4</sub> aqueous solution after 3 days(a) UV spectrum and concentration standard curve of BASFc in 0.5M Na<sub>2</sub>SO<sub>4</sub>(b)

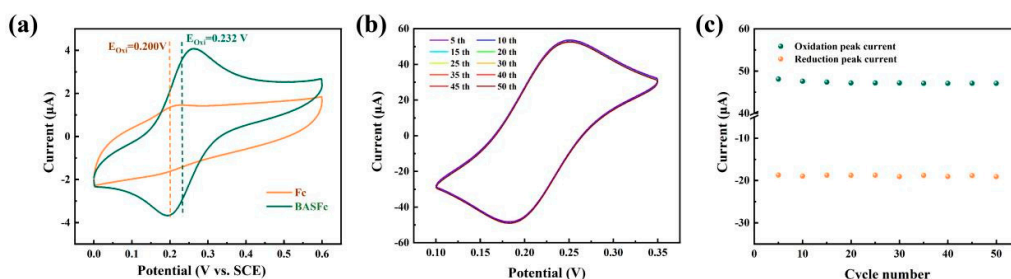

**Figure S2.** CV curves of saturated Fc and 0.5 mM BASFc in 0.5 M Na<sub>2</sub>SO<sub>4</sub> (a) CV curves for 50 consecutive cycles (b) and peak current attenuation with the number of scans in 0.5M Na<sub>2</sub>SO<sub>4</sub> (c)

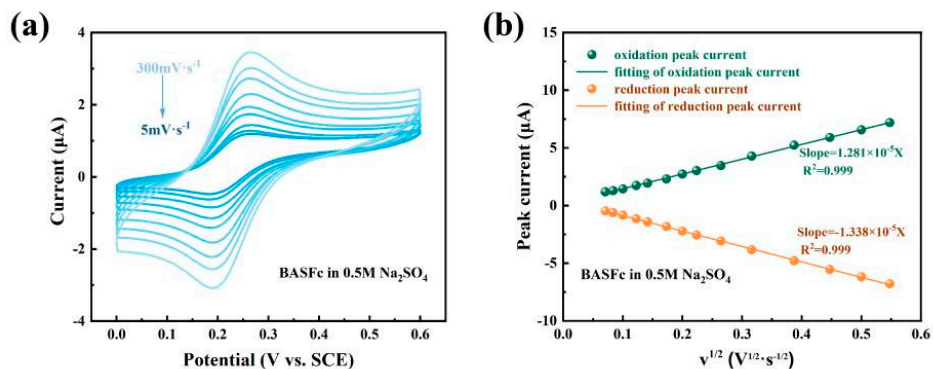

**Figure S3.** CV curves at different scan rates(a) of 0.5 mM BASFc and the linear relationship between the peak current and the square root of scan rate in 0.5M Na<sub>2</sub>SO<sub>4</sub> (b)

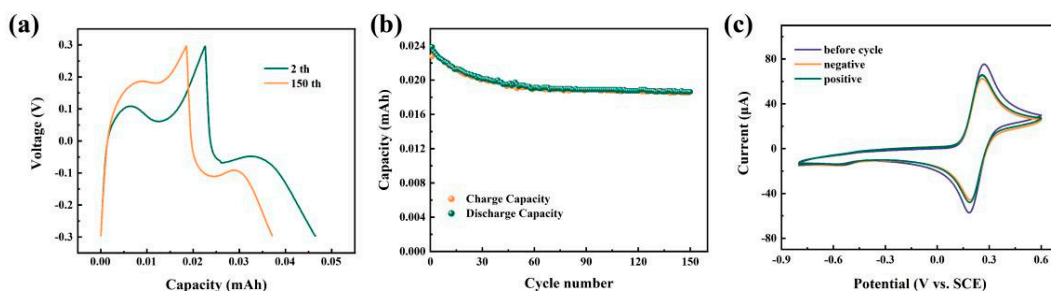

**Figure S4.** Charge-discharge curves for the flow battery with 10 mM BASFc + 0.5 M Na<sub>2</sub>SO<sub>4</sub> (10 mL) as cathode and anode at 5 mA cm<sup>-2</sup> of 2nd and 150th cycles (a) Curve of charge-discharge capacitance attenuation of the cell at 1 mA cm<sup>-2</sup> during 150 continuous charge and discharge cycles(b) CV curves of the positive BASFc electrolyte before and after charging-discharging(c)

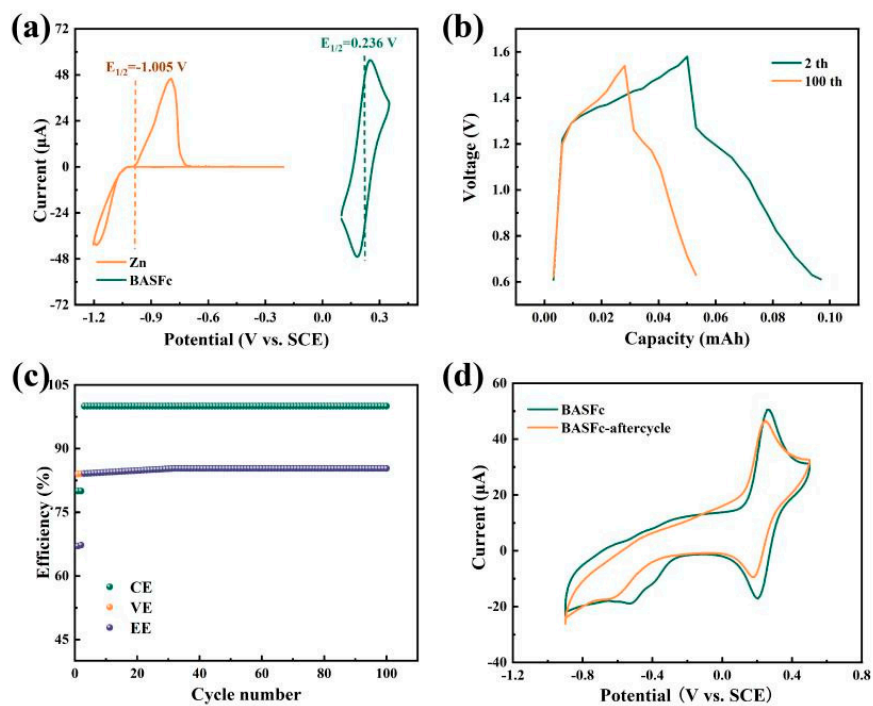

**Figure S5.** CV curves of 3 mM BASFc and zinc in 0.5M  $\text{Na}_2\text{SO}_4$  (18 mL) (a) Charge-discharge curves for the flow battery with 3 mM BASFc + 0.5 M  $\text{Na}_2\text{SO}_4$  (18mL) as cathode and Zn plate in 1M  $\text{ZnSO}_4$  (18 mL) as anode at  $5 \text{ mA cm}^{-2}$  of 2nd and 100th cycles (b) CE,VE and EE (c) of the cell at  $10 \text{ mA cm}^{-2}$  during 100 continuous charge and discharge cycles; CV curves of the positive BASFc electrolyte before and after charging-discharging

**Table S1.** Electrochemical kinetics data of BASFc and other ferrocene derivatives in aqueous solutions.

| Compound                                        | electrolyte                           | $k_0$ (cm s <sup>-1</sup> ) | D (cm <sup>2</sup> s <sup>-1</sup> ) |
|-------------------------------------------------|---------------------------------------|-----------------------------|--------------------------------------|
| QP-Fc[Error! Reference source not found.2]      | 1M NaCl                               | 0.011                       | $4.45 \times 10^{-6}$                |
| QB-Fc[Error! Reference source not found.2]      | 1M NaCl                               | 0.0179                      | $3.89 \times 10^{-6}$                |
| QH-Fc[Error! Reference source not found.2]      | 1M NaCl                               | 0.0179                      | $3.88 \times 10^{-6}$                |
| BQP-Fc[Error! Reference source not found.2]     | 1M NaCl                               | 0.0054                      | $3.73 \times 10^{-6}$                |
| BQB-Fc[Error! Reference source not found.2]     | 1M NaCl                               | 0.0037                      | $3.16 \times 10^{-6}$                |
| BQH-Fc[Error! Reference source not found.2]     | 1M NaCl                               | 0.0017                      | $2.40 \times 10^{-6}$                |
| BTMAP-Fc[Error! Reference source not found.7]   | 1M NaCl                               | 0.014                       | $3.1 \times 10^{-6}$                 |
| Fc-SO <sub>3</sub> Na[29]                       | 0.5 M Na <sub>2</sub> SO <sub>4</sub> | 0.0106                      | $3.17 \times 10^{-6}$                |
| Fc-SO <sub>3</sub> NH <sub>4</sub> [30]         | 1M NaCl                               |                             | $3.79 \times 10^{-8}$                |
|                                                 | 1 M NH <sub>4</sub> Cl                |                             | $3.20 \times 10^{-8}$                |
| C1-FcNCl[33]                                    | 1 M NH <sub>4</sub> Cl                | 0.126                       | $6.80 \times 10^{-6}$                |
| C2-FcNCl[33]                                    | 1 M NH <sub>4</sub> Cl                | 0.288                       | $6.10 \times 10^{-6}$                |
| C3-FcNCl[33]                                    | 1 M NH <sub>4</sub> Cl                | 0.193                       | $5.78 \times 10^{-6}$                |
| HEFc-HP-β-CD[38]                                | 1M NaCl                               | 0.00831                     | $1.87 \times 10^{-6}$                |
| HEFc-HP-β-CD[38]                                | 1M NaCl                               | 0.0122                      | $2.12 \times 10^{-6}$                |
| HMFc-HP-β-CD[38]                                | 1M NaCl                               | 0.037                       | $2.22 \times 10^{-6}$                |
| Zn[Fc(SPr) <sub>2</sub> ] [39]                  | 0.5 M NH <sub>4</sub> Cl              | 0.116                       | $3.84 \times 10^{-6}$                |
| imidazolium ferrocene bis(sulfonate) salts [40] | 1 M H <sub>2</sub> SO <sub>4</sub>    | 0.0105                      | $1.102 \times 10^{-6}$               |
| This work                                       | 0.5 M Na <sub>2</sub> SO <sub>4</sub> | 0.00595                     | $7.28 \times 10^{-8}$                |
|                                                 | 1 M H <sub>2</sub> SO <sub>4</sub>    | 0.0105                      | $2.27 \times 10^{-7}$                |

## References

- [12] Chen, Q.; Li, Y.; Liu, Y.; Sun, P.; Yang, Z.; Xu, T. Designer Ferrocene Catholyte for Aqueous Organic Flow Batteries. *ChemSusChem* 2021, 14, 1295-1301.
- [27] Beh, E. S.; Porcellinis, D. D.; Gracia, R. L.; Xia, K. T.; Gordon, R. G.; Aziz, M. J. A Neutral pH Aqueous Organic/Organometallic Redox Flow Battery with Extremely High Capacity Retention. *ACS Energy Lett.* 2017, 2, 639-644.
- [29] Yu, J.; Salla, M.; Zhang, H.; Ji, Y.; Zhang, F.; Zhou, M.; Wang, Q. A robust anionic sulfonated ferrocene derivative for pH-neutral aqueous flow battery. *Energy Storage Materials* 2020, 29, 216-222.
- [30] Yao, Y.; Xu, H.; Tian, Z.; Zhang, J.; Zhan, F.; Yan, M.; Jia, C. Simple-Synthesized Sulfonated Ferrocene Ammonium for Aqueous Redox Flow Batteries. *ACS Appl. Energy Mater.* 2021, 4, 8052-8058.
- [33] Luo, J.; Hu, M.; Yuan, B.; Liu, T.L. Mechanistic insights of cycling stability of ferrocene catholytes in aqueous redox flow batteries. *Energy Environ. Sci.* 2022, 15, 1315-1324.

- [38] Uosaki, K.; Sato, Y.; Kita, H. Electrochemical Characteristics of a Gold Electrode Modified with a Self - Assembled Monolayer of Ferrocenylalkanethiols. *Langmuir* 1991, 7, 1510-1514.
- [39] Schrage, B. R.; Zhang, B.; Petrochko, S. C.; Zhao, Z.; Frkonja-Kuczin, A.; Boika, A.; Ziegler, C. J. Highly Soluble Imidazolium Ferrocene Bis(sulfonate) Salts for Redox Flow Battery Applications. *Inorg. Chem.* 2021, 60, 10764–10771.
- [40] Luo, J.; Bo, H.; Wu, W.; Hu, M.; Liu, T. An Energy Dense, Powerful, Robust Bipolar Zinc-Ferrocene Redox Flow Battery. *Angew. Chem. Int. Ed.* 2022, 61, e202204030.
